# Supplementary material for: Do People Agree on How Positive Emotions Are Expressed? A Survey of Four Emotions and Five Modalities Across 11 Cultures
Source: Springer Nature journal article supplement (doi:10.1007/s10919-021-00376-0), 2021-07-22
Supplement: MOESM1 [file 19384688]

Electronic Supplementary Materials

Do People Agree on How Positive Emotions are Expressed?

A Survey of Four Emotions and Five Modalities across 11 Cultures

Journal of Nonverbal Behavior

Kunalan Manokara*

University of Amsterdam

Mirna Đurić

University of Amsterdam

Agneta Fischer

University of Amsterdam

Disa Sauter

University of Amsterdam

Author Notes

*Correspondence concerning this article should be addressed to Kunalan Manokara, Department of Social Psychology, University of Amsterdam, Netherlands.

E-mail address: k.manokara@uva.nl

Caption

This document provides results of post-hoc analyses (conducted per emotion, and per country) and additional analyses comparing countries.

**Table 1**

*Post-Hoc Pairwise McNemar’s Tests of Symmetry for Feeling Moved, Gratitude, Interest, and Triumph in the United States of America (Study 1a)*

| Comparison | Feeling Moved | | |  | Gratitude | | |  | Interest | | |  | Triumph | | |
| --- | --- | --- | --- | --- | --- | --- | --- | --- | --- | --- | --- | --- | --- | --- | --- |
|  | *df* |  |  |  | *df* |  |  |  | *df* |  |  |  | *df* |  |
| Voice – Face | 92.36 | 1 | <.001 |  | 26.06 | 1 | <.001 |  | 3.49 | 1 | .927 |  | 3.53 | 1 | .904 |
| Voice – Body | 23.78 | 1 | <.001 |  | 97.44 | 1 | <.001 |  | 78.42 | 1 | <.001 |  | 1.70 | 1 | 1.00 |
| Voice – Words | 0.30 | 1 | 1.00 |  | 30.05 | 1 | <.001 |  | 5.97 | 1 | .218 |  | 5.44 | 1 | .294 |
| Voice – Touch | 187.56 | 1 | <.001 |  | 195.87 | 1 | <.001 |  | 288.52 | 1 | <.001 |  | 424.91 | 1 | <.001 |
| Voice – Other | 528.46 | 1 | <.001 |  | 589.90 | 1 | <.001 |  | 601.23 | 1 | <.001 |  | 648.29 | 1 | <.001 |
| Face – Body | 174.01 | 1 | <.001 |  | 32.51 | 1 | <.001 |  | 116.25 | 1 | <.001 |  | 10.09 | 1 | .022 |
| Face – Words | 76.37 | 1 | <.001 |  | 95.69 | 1 | <.001 |  | 0.13 | 1 | 1.00 |  | 0.13 | 1 | 1.00 |
| Face – Touch | 399.71 | 1 | <.001 |  | 88.44 | 1 | <.001 |  | 328.34 | 1 | <.001 |  | 385.66 | 1 | <.001 |
| Face – Other | 719.34 | 1 | <.001 |  | 487.65 | 1 | <.001 |  | 643.10 | 1 | <.001 |  | 613.31 | 1 | <.001 |
| Body – Words | 26.27 | 1 | <.001 |  | 195.40 | 1 | <.001 |  | 116.55 | 1 | <.001 |  | 12.52 | 1 | .006 |
| Body – Touch | 91.28 | 1 | <.001 |  | 16.01 | 1 | <.001 |  | 96.51 | 1 | <.001 |  | 460.26 | 1 | <.001 |
| Body – Other | 422.04 | 1 | <.001 |  | 360.49 | 1 | <.001 |  | 402.74 | 1 | <.001 |  | 670.36 | 1 | <.001 |
| Words – Touch | 205.12 | 1 | <.001 |  | 320.14 | 1 | <.001 |  | 356.62 | 1 | <.001 |  | 384.99 | 1 | <.001 |
| Words – Other | 542.25 | 1 | <.001 |  | 704.20 | 1 | <.001 |  | 654.02 | 1 | <.001 |  | 608.23 | 1 | <.001 |
| Touch – Other | 245.41 | 1 | <.001 |  | 303.49 | 1 | <.001 |  | 225.58 | 1 | <.001 |  | 167.32 | 1 | <.001 |
| (per emotion) | .286 | | |  | .277 | | |  | .300 | | |  | .364 | | |

*Note.* We conducted McNemar’s tests without the continuity correction due to sufficiently large sample size, adequate distributions of expected frequencies, and because this correction can be overly conservative (Fagerland, Lydersen, & Laake, 2013), especially given the stringent p-adjustment method that we applied. The table also includes uncorrected effect sizes () for Cochran's Q per emotion.

**Table 2**

*Post-Hoc Pairwise McNemar’s Tests of Symmetry for Feeling Moved, Gratitude, Interest, and Triumph in the United States of America (Study 1b)*

| Comparison | Feeling Moved | | |  | Gratitude | | |  | Interest | | |  | Triumph | | |
| --- | --- | --- | --- | --- | --- | --- | --- | --- | --- | --- | --- | --- | --- | --- | --- |
|  | *df* |  |  |  | *df* |  |  |  | *df* |  |  |  | *df* |  |
| Voice – Face | 38.56 | 1 | < .001 |  | 56.43 | 1 | < .001 |  | 3.97 | 1 | .696 |  | 7.22 | 1 | .108 |
| Voice – Body | 17.19 | 1 | < .001 |  | 131.84 | 1 | < .001 |  | 42.82 | 1 | < .001 |  | 3.86 | 1 | .743 |
| Voice – Words | 0.88 | 1 | 1.00 |  | 17.19 | 1 | < .001 |  | 24.60 | 1 | < .001 |  | 4.64 | 1 | .468 |
| Voice – Touch | 73.13 | 1 | < .001 |  | 80.05 | 1 | < .001 |  | 129.56 | 1 | < .001 |  | 287.12 | 1 | < .001 |
| Voice – Other | 239.04 | 1 | < .001 |  | 295.45 | 1 | < .001 |  | 295.98 | 1 | < .001 |  | 345.10 | 1 | < .001 |
| Face – Body | 91.77 | 1 | < .001 |  | 32.81 | 1 | < .001 |  | 72.91 | 1 | < .001 |  | 20.45 | 1 | < .001 |
| Face – Words | 29.68 | 1 | < .001 |  | 108.33 | 1 | < .001 |  | 5.33 | 1 | .314 |  | 0.31 | 1 | 1.00 |
| Face – Touch | 170.28 | 1 | < .001 |  | 3.57 | 1 | .882 |  | 160.44 | 1 | < .001 |  | 245.68 | 1 | < .001 |
| Face – Other | 328.41 | 1 | < .001 |  | 173.13 | 1 | < .001 |  | 319.73 | 1 | < .001 |  | 310.58 | 1 | < .001 |
| Body – Words | 21.48 | 1 | < .001 |  | 190.67 | 1 | < .001 |  | 94.43 | 1 | < .001 |  | 14.21 | 1 | .002 |
| Body – Touch | 19.23 | 1 | < .001 |  | 13.55 | 1 | .003 |  | 41.02 | 1 | < .001 |  | 299.45 | 1 | < .001 |
| Body – Other | 168.65 | 1 | < .001 |  | 96.00 | 1 | < .001 |  | 196.00 | 1 | < .001 |  | 365.04 | 1 | < .001 |
| Words – Touch | 81.84 | 1 | < .001 |  | 140.50 | 1 | < .001 |  | 192.61 | 1 | < .001 |  | 260.51 | 1 | < .001 |
| Words – Other | 244.15 | 1 | < .001 |  | 333.40 | 1 | < .001 |  | 353.10 | 1 | < .001 |  | 318.42 | 1 | < .001 |
| Touch – Other | 114.80 | 1 | < .001 |  | 149.17 | 1 | < .001 |  | 116.67 | 1 | < .001 |  | 31.74 | 1 | < .001 |

*Note.* We conducted McNemar’s tests without the continuity correction due to sufficiently large sample size, adequate distributions of expected frequencies, and because this correction can be overly conservative (Fagerland, Lydersen, & Laake, 2013), especially given the stringent p-adjustment method that we applied.

**Comparison of US Samples (Study 1a – With Definitions, Study 1b – Without Definitions)**

We compared the two US samples in order to investigate whether any differences in response patterns would be detected. Specifically, the two samples were compared regarding responses for each of the modalities for expressing each emotion (5 modalities x 4 emotions = 20 combinations). We did not expect the two samples to significantly differ from one another in their responses to any modality/emotion combination.

First, we conducted 20 chi-square tests of homogeneity to test for differences between the two samples in self-reported modality use for expressing a given emotion. Given concerns from reviewers regarding potentially priming participants with definitions to answer in line with our hypotheses, we first focus our interpretations on the modalities previously hypothesized to be most commonly used to express each emotion (all results can be found in Table 3). The two samples significantly differed from each other. Contrary to expectations, each of the hypothesized modalities was reported significantly *more* frequently when definitions were *not* provided (Study 1b), than when they were provided (Study 1a). However, as can be seen in Table 3, nearly all modalities for all emotions were endorsed more when definitions were not provided.

Second, to potentially obtain evidence in favour of the null hypothesis, we conducted the Bayesian version of the same 20 chi-square tests using JASP 0.14.1.0 (JASP Team, 2020). We specified independent multinomial as the sampling scheme, the default prior concentration of 1 (Jamil et al., 2017), and the alternative hypothesis that the two samples are different. In line with the findings from frequentist testing, results showed decisive evidence in favour of the alternative hypothesis for all modalities previously hypothesized to be most commonly used to express a given emotion (all results reported in Table 3). More participants reported these modalities when definitions were not provided (Study 1b) than when they were provided (Study 1a). Once again, however, it can be seen that nearly all modalities for all emotions were reported more frequently by the Study 1b sample.

**Table 3**

*Comparison Between Two US Samples (Study 1a and Study 1b) Using Frequentist and Bayesian Chi-Square Approach*

|  |
| --- |
| **Emotion** | | **Modality** | ***x2*** | ***df*** | ***p*** | ***pBonferroni*** | ***φ*** | ***BF01*** |
| Feeling Moved | | Voice | 34.23 | 1 | < .001 | < .001 | .153 | 3.567 × 10-7 |
| **Face** | 35.32 | 1 | < .001 | < .001 | .155 | 9.376 × 10-8 |
| Body | 22.72 | 1 | < .001 | < .001 | .124 | 1.601 × 10-4 |
| Words | 40.16 | 1 | < .001 | < .001 | .166 | 1.517 × 10-8 |
| Touch | 45.53 | 1 | < .001 | < .001 | .176 | 3.226 × 10-9 |
| Gratitude | | **Voice** | 64.16 | 1 | < .001 | < .001 | .209 | 1.402 × 10-14 |
| Face | 12.07 | 1 | < .001 | .010 | .091 | 0.033 |
| Body | 2.74 | 1 | .098 | 1.00 | .043 | 3.607 |
| **Words** | 71.16 | 1 | < .001 | < .001 | .220 | 1.834 × 10-17 |
| Touch | 63.49 | 1 | < .001 | < .001 | .208 | 2.551 × 10-13 |
| Interest | | **Voice** | 36.69 | 1 | < .001 | < .001 | .158 | 7.824 × 10-8 |
| **Face** | 45.26 | 1 | < .001 | < .001 | .176 | 5.903 × 10-10 |
| Body | 29.61 | 1 | < .001 | < .001 | .142 | 5.182 × 10-6 |
| **Words** | 76.36 | 1 | < .001 | < .001 | .228 | 7.306 × 10-18 |
| Touch | 32.72 | 1 | < .001 | < .001 | .149 | 1.856 × 10-6 |
| Triumph | | **Voice** | 60.10 | 1 | < .001 | < .001 | .202 | 1.110 × 10-13 |
| **Face** | 41.72 | 1 | < .001 | < .001 | .169 | 4.809 × 10-9 |
| **Body** | 75.94 | 1 | < .001 | < .001 | .228 | 4.787 × 10-18 |
| Words | 52.20 | 1 | < .001 | < .001 | .189 | 1.548 × 10-11 |
| Touch | 0.33 | 1 | .567 | 1.00 | .015 | 14.706 |

*Note.* The phi coefficient (φ) was calculated as a measure of effect size for the frequentist chi-square tests. The modalities previously hypothesized as most frequently used to express a specific emotion are indicated in bold.

**Table 4**

*Post-Hoc Pairwise McNemar’s Tests of Symmetry for Feeling Moved, Gratitude, Interest, and Triumph in Australia*

| Comparison | Feeling Moved | | |  | Gratitude | | |  | Interest | | |  | Triumph | | |
| --- | --- | --- | --- | --- | --- | --- | --- | --- | --- | --- | --- | --- | --- | --- | --- |
|  | *df* |  |  |  | *df* |  |  |  | *df* |  |  |  | *df* |  |
| Voice – Face | 62.23 | 1 | < .001 |  | 0.67 | 1 | 1.00 |  | 6.86 | 1 | .132 |  | 3.43 | 1 | .961 |
| Voice – Body | 4.75 | 1 | .441 |  | 44.83 | 1 | < .001 |  | 24.27 | 1 | < .001 |  | 0.76 | 1 | 1.00 |
| Voice – Words | 0.32 | 1 | 1.00 |  | 20.90 | 1 | < .001 |  | 18.78 | 1 | < .001 |  | 15.52 | 1 | .001 |
| Voice – Touch | 19.06 | 1 | < .001 |  | 3.12 | 1 | 1.00 |  | 85.72 | 1 | < .001 |  | 108.30 | 1 | < .001 |
| Voice – Other | 109.30 | 1 | < .001 |  | 142.03 | 1 | < .001 |  | 122.27 | 1 | < .001 |  | 180.00 | 1 | < .001 |
| Face – Body | 82.29 | 1 | < .001 |  | 32.40 | 1 | < .001 |  | 47.11 | 1 | < .001 |  | 6.15 | 1 | .197 |
| Face – Words | 52.32 | 1 | < .001 |  | 25.33 | 1 | < .001 |  | 3.26 | 1 | 1.00 |  | 5.40 | 1 | .302 |
| Face – Touch | 111.29 | 1 | < .001 |  | 1.17 | 1 | 1.00 |  | 115.74 | 1 | < .001 |  | 96.33 | 1 | < .001 |
| Face – Other | 189.00 | 1 | < .001 |  | 129.44 | 1 | < .001 |  | 152.00 | 1 | < .001 |  | 168.00 | 1 | < .001 |
| Body – Words | 7.22 | 1 | .108 |  | 84.77 | 1 | < .001 |  | 61.63 | 1 | < .001 |  | 18.85 | 1 | < .001 |
| Body – Touch | 5.19 | 1 | .341 |  | 22.75 | 1 | < .001 |  | 44.18 | 1 | < .001 |  | 113.29 | 1 | < .001 |
| Body – Other | 87.36 | 1 | < .001 |  | 75.70 | 1 | < .001 |  | 75.41 | 1 | < .001 |  | 185.00 | 1 | < .001 |
| Words – Touch | 27.43 | 1 | < .001 |  | 46.62 | 1 | < .001 |  | 130.67 | 1 | < .001 |  | 67.85 | 1 | < .001 |
| Words – Other | 116.13 | 1 | < .001 |  | 178.02 | 1 | < .001 |  | 165.02 | 1 | < .001 |  | 148.03 | 1 | < .001 |
| Touch – Other | 64.80 | 1 | < .001 |  | 120.47 | 1 | < .001 |  | 22.09 | 1 | < .001 |  | 64.06 | 1 | < .001 |

*Note.* We conducted McNemar’s tests without the continuity correction due to sufficiently large sample size, adequate distributions of expected frequencies, and because this correction can be overly conservative (Fagerland, Lydersen, & Laake, 2013), especially given the stringent p-adjustment method that we applied.

**Table 5**

*Post-Hoc Pairwise McNemar’s Tests of Symmetry for Feeling Moved, Gratitude, Interest, and Triumph in Austria*

| Comparison | Feeling Moved | | |  | Gratitude | | |  | Interest | | |  | Triumph | | |
| --- | --- | --- | --- | --- | --- | --- | --- | --- | --- | --- | --- | --- | --- | --- | --- |
|  | *df* |  |  |  | *df* |  |  |  | *df* |  |  |  | *df* |  |
| Voice – Face | 21.88 | 1 | < .001 |  | 4.41 | 1 | .535 |  | 3.31 | 1 | 1.00 |  | 10.53 | 1 | .018 |
| Voice – Body | 1.14 | 1 | 1.00 |  | 10.88 | 1 | .015 |  | 27.74 | 1 | < .001 |  | 3.46 | 1 | .945 |
| Voice – Words | 1.26 | 1 | 1.00 |  | 32.00 | 1 | < .001 |  | 11.95 | 1 | .008 |  | 10.53 | 1 | .018 |
| Voice – Touch | 8.47 | 1 | .054 |  | 0.00 | 1 | 1.00 |  | 79.18 | 1 | < .001 |  | 91.16 | 1 | < .001 |
| Voice – Other | 75.41 | 1 | < .001 |  | 84.17 | 1 | < .001 |  | 94.00 | 1 | < .001 |  | 117.00 | 1 | < .001 |
| Face – Body | 33.06 | 1 | < .001 |  | 2.12 | 1 | 1.00 |  | 45.46 | 1 | < .001 |  | 18.84 | 1 | < .001 |
| Face – Words | 27.00 | 1 | < .001 |  | 46.12 | 1 | < .001 |  | 3.77 | 1 | .783 |  | 0.00 | 1 | 1.00 |
| Face – Touch | 48.05 | 1 | < .001 |  | 3.76 | 1 | .785 |  | 94.04 | 1 | < .001 |  | 69.44 | 1 | < .001 |
| Face – Other | 119.00 | 1 | < .001 |  | 66.46 | 1 | < .001 |  | 107.00 | 1 | < .001 |  | 95.04 | 1 | < .001 |
| Body – Words | 0.02 | 1 | 1.00 |  | 61.49 | 1 | < .001 |  | 56.35 | 1 | < .001 |  | 18.13 | 1 | < .001 |
| Body – Touch | 3.66 | 1 | .837 |  | 11.22 | 1 | .012 |  | 28.88 | 1 | < .001 |  | 106.00 | 1 | < .001 |
| Body – Other | 69.21 | 1 | < .001 |  | 53.93 | 1 | < .001 |  | 49.00 | 1 | < .001 |  | 128.00 | 1 | < .001 |
| Words – Touch | 4.74 | 1 | .443 |  | 29.63 | 1 | < .001 |  | 108.04 | 1 | < .001 |  | 66.18 | 1 | < .001 |
| Words – Other | 66.78 | 1 | < .001 |  | 126.03 | 1 | < .001 |  | 121.00 | 1 | < .001 |  | 97.00 | 1 | < .001 |
| Touch – Other | 49.98 | 1 | < .001 |  | 84.17 | 1 | < .001 |  | 11.00 | 1 | .014 |  | 20.17 | 1 | < .001 |

*Note.* We conducted McNemar’s tests without the continuity correction due to sufficiently large sample size, adequate distributions of expected frequencies, and because this correction can be overly conservative (Fagerland, Lydersen, & Laake, 2013), especially given the stringent p-adjustment method that we applied.

**Table 6**

*Post-Hoc Pairwise McNemar’s Tests of Symmetry for Feeling Moved, Gratitude, Interest, and Triumph in Canada*

| Comparison | Feeling Moved | | |  | Gratitude | | |  | Interest | | |  | Triumph | | |
| --- | --- | --- | --- | --- | --- | --- | --- | --- | --- | --- | --- | --- | --- | --- | --- |
|  | *df* |  |  |  | *df* |  |  |  | *df* |  |  |  | *df* |  |
| Voice – Face | 21.49 | 1 | < .001 |  | 1.53 | 1 | 1.00 |  | 0.49 | 1 | 1.00 |  | 4.57 | 1 | .489 |
| Voice – Body | 7.20 | 1 | .109 |  | 32.01 | 1 | < .001 |  | 30.49 | 1 | < .001 |  | 0.86 | 1 | 1.00 |
| Voice – Words | 0.08 | 1 | 1.00 |  | 34.38 | 1 | < .001 |  | 8.02 | 1 | .069 |  | 18.69 | 1 | < .001 |
| Voice – Touch | 33.64 | 1 | < .001 |  | 14.82 | 1 | .002 |  | 78.48 | 1 | < .001 |  | 98.56 | 1 | < .001 |
| Voice – Other | 119.03 | 1 | < .001 |  | 104.13 | 1 | < .001 |  | 131.00 | 1 | < .001 |  | 152.00 | 1 | < .001 |
| Face – Body | 40.95 | 1 | < .001 |  | 20.63 | 1 | < .001 |  | 41.26 | 1 | < .001 |  | 7.71 | 1 | .082 |
| Face – Words | 21.73 | 1 | < .001 |  | 43.31 | 1 | < .001 |  | 4.25 | 1 | .590 |  | 4.41 | 1 | .535 |
| Face – Touch | 87.36 | 1 | < .001 |  | 9.62 | 1 | .029 |  | 88.70 | 1 | < .001 |  | 82.37 | 1 | < .001 |
| Face – Other | 156.00 | 1 | < .001 |  | 95.22 | 1 | < .001 |  | 137.00 | 1 | < .001 |  | 137.03 | 1 | < .001 |
| Body – Words | 5.90 | 1 | .227 |  | 83.05 | 1 | < .001 |  | 54.20 | 1 | < .001 |  | 18.65 | 1 | < .001 |
| Body – Touch | 16.51 | 1 | < .001 |  | 2.60 | 1 | 1.00 |  | 30.22 | 1 | < .001 |  | 105.31 | 1 | < .001 |
| Body – Other | 93.16 | 1 | < .001 |  | 53.77 | 1 | < .001 |  | 77.19 | 1 | < .001 |  | 155.03 | 1 | < .001 |
| Words – Touch | 35.64 | 1 | < .001 |  | 66.46 | 1 | < .001 |  | 105.13 | 1 | < .001 |  | 63.75 | 1 | < .001 |
| Words – Other | 117.03 | 1 | < .001 |  | 153.00 | 1 | < .001 |  | 152.00 | 1 | < .001 |  | 123.00 | 1 | < .001 |
| Touch – Other | 59.24 | 1 | < .001 |  | 70.55 | 1 | < .001 |  | 32.40 | 1 | < .001 |  | 44.08 | 1 | < .001 |

*Note.* We conducted McNemar’s tests without the continuity correction due to sufficiently large sample size, adequate distributions of expected frequencies, and because this correction can be overly conservative (Fagerland, Lydersen, & Laake, 2013), especially given the stringent p-adjustment method that we applied.

**Table 7**

*Post-Hoc Pairwise McNemar’s Tests of Symmetry for Feeling Moved, Gratitude, Interest, and Triumph in China*

| Comparison | Feeling Moved | | |  | Gratitude | | |  | Interest | | |  | Triumph | | |
| --- | --- | --- | --- | --- | --- | --- | --- | --- | --- | --- | --- | --- | --- | --- | --- |
|  | *df* |  |  |  | *df* |  |  |  | *df* |  |  |  | *df* |  |
| Voice – Face | 18.85 | 1 | < .001 |  | 0.31 | 1 | 1.00 |  | 11.52 | 1 | .010 |  | 2.69 | 1 | 1.00 |
| Voice – Body | 0.90 | 1 | 1.00 |  | 23.29 | 1 | < .001 |  | 0.08 | 1 | 1.00 |  | 12.94 | 1 | .005 |
| Voice – Words | 17.31 | 1 | < .001 |  | 38.48 | 1 | < .001 |  | 24.93 | 1 | < .001 |  | 0.67 | 1 | 1.00 |
| Voice – Touch | 0.92 | 1 | 1.00 |  | 3.19 | 1 | 1.00 |  | 1.29 | 1 | 1.00 |  | 34.57 | 1 | < .001 |
| Voice – Other | 40.00 | 1 | < .001 |  | 20.45 | 1 | < .001 |  | 43.31 | 1 | < .001 |  | 73.00 | 1 | < .001 |
| Face – Body | 12.94 | 1 | .005 |  | 24.02 | 1 | < .001 |  | 9.31 | 1 | .034 |  | 33.33 | 1 | < .001 |
| Face – Words | 0.34 | 1 | 1.00 |  | 35.71 | 1 | < .001 |  | 4.79 | 1 | .430 |  | 0.58 | 1 | 1.00 |
| Face – Touch | 9.12 | 1 | .038 |  | 2.00 | 1 | 1.00 |  | 3.46 | 1 | .942 |  | 22.22 | 1 | < .001 |
| Face – Other | 73.05 | 1 | < .001 |  | 23.17 | 1 | < .001 |  | 69.05 | 1 | < .001 |  | 60.06 | 1 | < .001 |
| Body – Words | 10.29 | 1 | .020 |  | 4.25 | 1 | .590 |  | 19.84 | 1 | < .001 |  | 19.44 | 1 | < .001 |
| Body – Touch | 0.02 | 1 | 1.00 |  | 8.56 | 1 | .051 |  | 0.89 | 1 | 1.00 |  | 64.20 | 1 | < .001 |
| Body – Other | 44.08 | 1 | < .001 |  | 57.80 | 1 | < .001 |  | 47.08 | 1 | < .001 |  | 100.04 | 1 | < .001 |
| Words – Touch | 8.40 | 1 | .056 |  | 22.22 | 1 | < .001 |  | 12.86 | 1 | .005 |  | 27.77 | 1 | < .001 |
| Words – Other | 70.00 | 1 | < .001 |  | 75.70 | 1 | < .001 |  | 84.05 | 1 | < .001 |  | 65.06 | 1 | < .001 |
| Touch – Other | 47.00 | 1 | < .001 |  | 34.89 | 1 | < .001 |  | 54.07 | 1 | < .001 |  | 29.00 | 1 | < .001 |

*Note.* We conducted McNemar’s tests without the continuity correction due to sufficiently large sample size, adequate distributions of expected frequencies, and because this correction can be overly conservative (Fagerland, Lydersen, & Laake, 2013), especially given the stringent p-adjustment method that we applied.

**Table 8**

*Post-Hoc Pairwise McNemar’s Tests of Symmetry for Feeling Moved, Gratitude, Interest, and Triumph in Croatia*

| Comparison | Feeling Moved | | |  | Gratitude | | |  | Interest | | |  | Triumph | | |
| --- | --- | --- | --- | --- | --- | --- | --- | --- | --- | --- | --- | --- | --- | --- | --- |
|  | *df* |  |  |  | *df* |  |  |  | *df* |  |  |  | *df* |  |
| Voice – Face | 80.22 | 1 | < .001 |  | 0.08 | 1 | 1.00 |  | 23.73 | 1 | < .001 |  | 32.58 | 1 | < .001 |
| Voice – Body | 7.51 | 1 | .092 |  | 10.29 | 1 | .020 |  | 14.58 | 1 | .002 |  | 0.62 | 1 | 1.00 |
| Voice – Words | 11.76 | 1 | .009 |  | 91.02 | 1 | < .001 |  | 51.27 | 1 | < .001 |  | 29.84 | 1 | < .001 |
| Voice – Touch | 45.65 | 1 | < .001 |  | 0.81 | 1 | 1.00 |  | 115.10 | 1 | < .001 |  | 194.02 | 1 | < .001 |
| Voice – Other | 149.95 | 1 | < .001 |  | 91.37 | 1 | < .001 |  | 137.88 | 1 | < .001 |  | 240.55 | 1 | < .001 |
| Face – Body | 116.81 | 1 | < .001 |  | 11.84 | 1 | .009 |  | 67.98 | 1 | < .001 |  | 43.75 | 1 | < .001 |
| Face – Words | 130.31 | 1 | < .001 |  | 100.81 | 1 | < .001 |  | 5.37 | 1 | .307 |  | 0.01 | 1 | 1.00 |
| Face – Touch | 183.49 | 1 | < .001 |  | 0.48 | 1 | 1.00 |  | 179.51 | 1 | < .001 |  | 121.32 | 1 | < .001 |
| Face – Other | 277.22 | 1 | < .001 |  | 95.26 | 1 | < .001 |  | 201.10 | 1 | < .001 |  | 175.24 | 1 | < .001 |
| Body – Words | 0.36 | 1 | 1.00 |  | 136.25 | 1 | < .001 |  | 97.16 | 1 | < .001 |  | 39.08 | 1 | < .001 |
| Body – Touch | 20.21 | 1 | < .001 |  | 16.03 | 1 | < .001 |  | 67.24 | 1 | < .001 |  | 196.30 | 1 | < .001 |
| Body – Other | 117.56 | 1 | < .001 |  | 56.25 | 1 | < .001 |  | 86.43 | 1 | < .001 |  | 246.72 | 1 | < .001 |
| Words – Touch | 14.90 | 1 | .002 |  | 83.98 | 1 | < .001 |  | 212.61 | 1 | < .001 |  | 118.72 | 1 | < .001 |
| Words – Other | 112.16 | 1 | < .001 |  | 236.20 | 1 | < .001 |  | 230.76 | 1 | < .001 |  | 177.72 | 1 | < .001 |
| Touch – Other | 66.28 | 1 | < .001 |  | 103.91 | 1 | < .001 |  | 8.33 | 1 | .058 |  | 42.38 | 1 | < .001 |

*Note.* We conducted McNemar’s tests without the continuity correction due to sufficiently large sample size, adequate distributions of expected frequencies, and because this correction can be overly conservative (Fagerland, Lydersen, & Laake, 2013), especially given the stringent p-adjustment method that we applied.

**Table 9**

*Post-Hoc Pairwise McNemar’s Tests of Symmetry for Feeling Moved, Gratitude, Interest, and Triumph in England*

| Comparison | Feeling Moved | | |  | Gratitude | | |  | Interest | | |  | Triumph | | |
| --- | --- | --- | --- | --- | --- | --- | --- | --- | --- | --- | --- | --- | --- | --- | --- |
|  | *df* |  |  |  | *df* |  |  |  | *df* |  |  |  | *df* |  |
| Voice – Face | 54.72 | 1 | < .001 |  | 3.81 | 1 | .763 |  | 2.06 | 1 | 1.00 |  | 1.09 | 1 | 1.00 |
| Voice – Body | 16.90 | 1 | < .001 |  | 49.33 | 1 | < .001 |  | 46.22 | 1 | < .001 |  | 0.02 | 1 | 1.00 |
| Voice – Words | 2.06 | 1 | 1.00 |  | 30.56 | 1 | < .001 |  | 24.89 | 1 | < .001 |  | 4.59 | 1 | .482 |
| Voice – Touch | 10.00 | 1 | .023 |  | 2.85 | 1 | 1.00 |  | 102.15 | 1 | < .001 |  | 114.03 | 1 | < .001 |
| Voice – Other | 110.00 | 1 | < .001 |  | 128.26 | 1 | < .001 |  | 138.00 | 1 | < .001 |  | 166.00 | 1 | < .001 |
| Face – Body | 95.22 | 1 | < .001 |  | 32.98 | 1 | < .001 |  | 60.19 | 1 | < .001 |  | 1.45 | 1 | 1.00 |
| Face – Words | 40.11 | 1 | < .001 |  | 43.56 | 1 | < .001 |  | 10.25 | 1 | .021 |  | 1.28 | 1 | 1.00 |
| Face – Touch | 86.73 | 1 | < .001 |  | 0.00 | 1 | 1.00 |  | 108.78 | 1 | < .001 |  | 101.55 | 1 | < .001 |
| Face – Other | 179.00 | 1 | < .001 |  | 111.50 | 1 | < .001 |  | 148.03 | 1 | < .001 |  | 157.02 | 1 | < .001 |
| Body – Words | 25.27 | 1 | < .001 |  | 100.55 | 1 | < .001 |  | 95.22 | 1 | < .001 |  | 4.74 | 1 | .442 |
| Body – Touch | 0.69 | 1 | 1.00 |  | 30.73 | 1 | < .001 |  | 21.73 | 1 | < .001 |  | 115.03 | 1 | < .001 |
| Body – Other | 67.46 | 1 | < .001 |  | 59.85 | 1 | < .001 |  | 65.22 | 1 | < .001 |  | 165.02 | 1 | < .001 |
| Words – Touch | 18.77 | 1 | < .001 |  | 44.80 | 1 | < .001 |  | 141.03 | 1 | < .001 |  | 93.59 | 1 | < .001 |
| Words – Other | 120.03 | 1 | < .001 |  | 173.02 | 1 | < .001 |  | 175.00 | 1 | < .001 |  | 149.03 | 1 | < .001 |
| Touch – Other | 71.11 | 1 | < .001 |  | 111.50 | 1 | < .001 |  | 30.12 | 1 | < .001 |  | 44.64 | 1 | < .001 |

*Note.* We conducted McNemar’s tests without the continuity correction due to sufficiently large sample size, adequate distributions of expected frequencies, and because this correction can be overly conservative (Fagerland, Lydersen, & Laake, 2013), especially given the stringent p-adjustment method that we applied.

**Table 10**

*Post-Hoc Pairwise McNemar’s Tests of Symmetry for Feeling Moved, Gratitude, Interest, and Triumph in Germany*

| Comparison | Feeling Moved | | |  | Gratitude | | |  | Interest | | |  | Triumph | | |
| --- | --- | --- | --- | --- | --- | --- | --- | --- | --- | --- | --- | --- | --- | --- | --- |
|  | *df* |  |  |  | *df* |  |  |  | *df* |  |  |  | *df* |  |
| Voice – Face | 33.62 | 1 | < .001 |  | 1.53 | 1 | 1.00 |  | 11.53 | 1 | .010 |  | 1.14 | 1 | 1.00 |
| Voice – Body | 14.14 | 1 | .003 |  | 25.20 | 1 | < .001 |  | 18.00 | 1 | < .001 |  | 7.00 | 1 | .122 |
| Voice – Words | 2.00 | 1 | 1.00 |  | 45.63 | 1 | < .001 |  | 39.06 | 1 | < .001 |  | 4.79 | 1 | .430 |
| Voice – Touch | 16.33 | 1 | < .001 |  | 6.67 | 1 | .147 |  | 41.26 | 1 | < .001 |  | 86.04 | 1 | < .001 |
| Voice – Other | 88.36 | 1 | < .001 |  | 85.37 | 1 | < .001 |  | 78.05 | 1 | < .001 |  | 124.00 | 1 | < .001 |
| Face – Body | 70.44 | 1 | < .001 |  | 16.75 | 1 | < .001 |  | 47.63 | 1 | < .001 |  | 13.36 | 1 | .004 |
| Face – Words | 43.22 | 1 | < .001 |  | 60.00 | 1 | < .001 |  | 9.31 | 1 | .034 |  | 1.14 | 1 | 1.00 |
| Face – Touch | 72.43 | 1 | < .001 |  | 14.25 | 1 | .002 |  | 75.06 | 1 | < .001 |  | 73.72 | 1 | < .001 |
| Face – Other | 135.03 | 1 | < .001 |  | 76.41 | 1 | < .001 |  | 106.04 | 1 | < .001 |  | 117.00 | 1 | < .001 |
| Body – Words | 6.87 | 1 | .131 |  | 89.16 | 1 | < .001 |  | 68.48 | 1 | < .001 |  | 17.89 | 1 | < .001 |
| Body – Touch | 0.06 | 1 | 1.00 |  | 50.58 | 1 | < .001 |  | 10.00 | 1 | .023 |  | 102.00 | 1 | < .001 |
| Body – Other | 55.54 | 1 | < .001 |  | 45.30 | 1 | < .001 |  | 44.00 | 1 | < .001 |  | 138.00 | 1 | < .001 |
| Words – Touch | 9.62 | 1 | .029 |  | 31.00 | 1 | < .001 |  | 100.32 | 1 | < .001 |  | 67.46 | 1 | < .001 |
| Words – Other | 78.40 | 1 | < .001 |  | 140.03 | 1 | < .001 |  | 130.00 | 1 | < .001 |  | 109.00 | 1 | < .001 |
| Touch – Other | 53.55 | 1 | < .001 |  | 107.14 | 1 | < .001 |  | 22.15 | 1 | < .001 |  | 36.00 | 1 | < .001 |

*Note.* We conducted McNemar’s tests without the continuity correction due to sufficiently large sample size, adequate distributions of expected frequencies, and because this correction can be overly conservative (Fagerland, Lydersen, & Laake, 2013), especially given the stringent p-adjustment method that we applied.

**Table 11**

*Post-Hoc Pairwise McNemar’s Tests of Symmetry for Feeling Moved, Gratitude, Interest, and Triumph in India*

| Comparison | Feeling Moved | | |  | Gratitude | | |  | Interest | | |  | Triumph | | |
| --- | --- | --- | --- | --- | --- | --- | --- | --- | --- | --- | --- | --- | --- | --- | --- |
|  | *df* |  |  |  | *df* |  |  |  | *df* |  |  |  | *df* |  |
| Voice – Face | 71.74 | 1 | < .001 |  | 45.15 | 1 | < .001 |  | 53.77 | 1 | < .001 |  | 6.15 | 1 | .197 |
| Voice – Body | 5.45 | 1 | .293 |  | 14.52 | 1 | .002 |  | 0.24 | 1 | 1.00 |  | 5.77 | 1 | .245 |
| Voice – Words | 22.27 | 1 | < .001 |  | 88.17 | 1 | < .001 |  | 33.82 | 1 | < .001 |  | 10.26 | 1 | .020 |
| Voice – Touch | 10.65 | 1 | .017 |  | 19.80 | 1 | < .001 |  | 27.94 | 1 | < .001 |  | 68.76 | 1 | < .001 |
| Voice – Other | 19.57 | 1 | < .001 |  | 7.71 | 1 | .082 |  | 34.57 | 1 | < .001 |  | 102.15 | 1 | < .001 |
| Face – Body | 50.58 | 1 | < .001 |  | 14.29 | 1 | .002 |  | 56.89 | 1 | < .001 |  | 0.10 | 1 | 1.00 |
| Face – Words | 30.25 | 1 | < .001 |  | 27.94 | 1 | < .001 |  | 6.12 | 1 | .201 |  | 0.44 | 1 | 1.00 |
| Face – Touch | 32.89 | 1 | < .001 |  | 7.12 | 1 | .114 |  | 105.00 | 1 | < .001 |  | 49.03 | 1 | < .001 |
| Face – Other | 101.55 | 1 | < .001 |  | 59.88 | 1 | < .001 |  | 110.04 | 1 | < .001 |  | 81.66 | 1 | < .001 |
| Body – Words | 4.76 | 1 | .436 |  | 53.89 | 1 | < .001 |  | 26.30 | 1 | < .001 |  | 0.78 | 1 | 1.00 |
| Body – Touch | 2.32 | 1 | 1.00 |  | 0.42 | 1 | 1.00 |  | 34.31 | 1 | < .001 |  | 57.25 | 1 | < .001 |
| Body – Other | 35.06 | 1 | < .001 |  | 33.06 | 1 | < .001 |  | 41.14 | 1 | < .001 |  | 83.65 | 1 | < .001 |
| Words – Touch | 0.51 | 1 | 1.00 |  | 50.45 | 1 | < .001 |  | 80.39 | 1 | < .001 |  | 46.54 | 1 | < .001 |
| Words – Other | 53.48 | 1 | < .001 |  | 104.31 | 1 | < .001 |  | 91.04 | 1 | < .001 |  | 83.05 | 1 | < .001 |
| Touch – Other | 49.03 | 1 | < .001 |  | 37.70 | 1 | < .001 |  | 2.58 | 1 | 1.00 |  | 19.57 | 1 | < .001 |

*Note.* We conducted McNemar’s tests without the continuity correction due to sufficiently large sample size, adequate distributions of expected frequencies, and because this correction can be overly conservative (Fagerland, Lydersen, & Laake, 2013), especially given the stringent p-adjustment method that we applied.

**Table 12**

*Post-Hoc Pairwise McNemar’s Tests of Symmetry for Feeling Moved, Gratitude, Interest, and Triumph in the Netherlands*

| Comparison | Feeling Moved | | |  | Gratitude | | |  | Interest | | |  | Triumph | | |
| --- | --- | --- | --- | --- | --- | --- | --- | --- | --- | --- | --- | --- | --- | --- | --- |
|  | *df* |  |  |  | *df* |  |  |  | *df* |  |  |  | *df* |  |
| Voice – Face | 55.25 | 1 | < .001 |  | 4.26 | 1 | .585 |  | 7.90 | 1 | .074 |  | 2.17 | 1 | 1.00 |
| Voice – Body | 11.57 | 1 | .010 |  | 7.68 | 1 | .084 |  | 5.08 | 1 | .362 |  | 27.00 | 1 | < .001 |
| Voice – Words | 4.57 | 1 | .488 |  | 65.79 | 1 | < .001 |  | 38.48 | 1 | < .001 |  | 7.23 | 1 | .108 |
| Voice – Touch | 15.25 | 1 | .001 |  | 28.52 | 1 | < .001 |  | 33.20 | 1 | < .001 |  | 53.93 | 1 | < .001 |
| Voice – Other | 74.05 | 1 | < .001 |  | 47.61 | 1 | < .001 |  | 60.24 | 1 | < .001 |  | 91.04 | 1 | < .001 |
| Face – Body | 80.39 | 1 | < .001 |  | 21.35 | 1 | < .001 |  | 23.21 | 1 | < .001 |  | 17.79 | 1 | < .001 |
| Face – Words | 71.20 | 1 | < .001 |  | 50.45 | 1 | < .001 |  | 15.00 | 1 | .002 |  | 14.78 | 1 | .002 |
| Face – Touch | 90.00 | 1 | < .001 |  | 15.75 | 1 | .001 |  | 55.05 | 1 | < .001 |  | 56.64 | 1 | < .001 |
| Face – Other | 135.00 | 1 | < .001 |  | 61.49 | 1 | < .001 |  | 83.18 | 1 | < .001 |  | 103.00 | 1 | < .001 |
| Body – Words | 1.98 | 1 | 1.00 |  | 86.37 | 1 | < .001 |  | 56.35 | 1 | < .001 |  | 42.19 | 1 | < .001 |
| Body – Touch | 0.27 | 1 | 1.00 |  | 51.20 | 1 | < .001 |  | 16.10 | 1 | < .001 |  | 93.16 | 1 | < .001 |
| Body – Other | 49.00 | 1 | < .001 |  | 27.52 | 1 | < .001 |  | 45.00 | 1 | < .001 |  | 129.00 | 1 | < .001 |
| Words – Touch | 4.79 | 1 | .430 |  | 20.63 | 1 | < .001 |  | 92.35 | 1 | < .001 |  | 26.67 | 1 | < .001 |
| Words – Other | 56.25 | 1 | < .001 |  | 126.00 | 1 | < .001 |  | 115.03 | 1 | < .001 |  | 70.05 | 1 | < .001 |
| Touch – Other | 43.09 | 1 | < .001 |  | 92.35 | 1 | < .001 |  | 14.44 | 1 | .002 |  | 30.12 | 1 | < .001 |

*Note.* We conducted McNemar’s tests without the continuity correction due to sufficiently large sample size, adequate distributions of expected frequencies, and because this correction can be overly conservative (Fagerland, Lydersen, & Laake, 2013), especially given the stringent p-adjustment method that we applied.

**Table 13**

*Post-Hoc Pairwise McNemar’s Tests of Symmetry for Feeling Moved, Gratitude, Interest, and Triumph in Russia*

| Comparison | Feeling Moved | | |  | Gratitude | | |  | Interest | | |  | Triumph | | |
| --- | --- | --- | --- | --- | --- | --- | --- | --- | --- | --- | --- | --- | --- | --- | --- |
|  | *df* |  |  |  | *df* |  |  |  | *df* |  |  |  | *df* |  |
| Voice – Face | 35.56 | 1 | < .001 |  | 1.80 | 1 | 1.00 |  | 14.52 | 1 | .002 |  | 12.76 | 1 | .005 |
| Voice – Body | 9.29 | 1 | .035 |  | 8.64 | 1 | .049 |  | 13.64 | 1 | .003 |  | 0.44 | 1 | 1.00 |
| Voice – Words | 0.96 | 1 | 1.00 |  | 34.68 | 1 | < .001 |  | 25.81 | 1 | < .001 |  | 23.29 | 1 | < .001 |
| Voice – Touch | 6.39 | 1 | .172 |  | 0.00 | 1 | 1.00 |  | 42.38 | 1 | < .001 |  | 86.63 | 1 | < .001 |
| Voice – Other | 43.68 | 1 | < .001 |  | 58.56 | 1 | < .001 |  | 48.56 | 1 | < .001 |  | 103.81 | 1 | < .001 |
| Face – Body | 69.75 | 1 | < .001 |  | 2.86 | 1 | 1.00 |  | 42.05 | 1 | < .001 |  | 17.16 | 1 | < .001 |
| Face – Words | 43.90 | 1 | < .001 |  | 58.06 | 1 | < .001 |  | 2.32 | 1 | 1.00 |  | 2.77 | 1 | 1.00 |
| Face – Touch | 57.04 | 1 | < .001 |  | 1.59 | 1 | 1.00 |  | 76.70 | 1 | < .001 |  | 61.83 | 1 | < .001 |
| Face – Other | 109.30 | 1 | < .001 |  | 55.35 | 1 | < .001 |  | 77.92 | 1 | < .001 |  | 79.02 | 1 | < .001 |
| Body – Words | 4.45 | 1 | .525 |  | 62.69 | 1 | < .001 |  | 51.04 | 1 | < .001 |  | 30.41 | 1 | < .001 |
| Body – Touch | 0.16 | 1 | 1.00 |  | 8.64 | 1 | .049 |  | 13.00 | 1 | .005 |  | 96.04 | 1 | < .001 |
| Body – Other | 24.90 | 1 | < .001 |  | 37.70 | 1 | < .001 |  | 21.49 | 1 | < .001 |  | 111.29 | 1 | < .001 |
| Words – Touch | 2.97 | 1 | 1.00 |  | 38.82 | 1 | < .001 |  | 90.35 | 1 | < .001 |  | 47.52 | 1 | < .001 |
| Words – Other | 41.44 | 1 | < .001 |  | 120.13 | 1 | < .001 |  | 91.12 | 1 | < .001 |  | 66.18 | 1 | < .001 |
| Touch – Other | 28.49 | 1 | < .001 |  | 61.25 | 1 | < .001 |  | 2.08 | 1 | 1.00 |  | 10.94 | 1 | .014 |

*Note.* We conducted McNemar’s tests without the continuity correction due to sufficiently large sample size, adequate distributions of expected frequencies, and because this correction can be overly conservative (Fagerland, Lydersen, & Laake, 2013), especially given the stringent p-adjustment method that we applied.

**Cross-Cultural Comparisons**

We explored the differences between countries regarding responses for each of the five modalities for expressing each of the four emotions. Analogous to the analytic approach for comparing the two US samples (see before), we conducted 20 chi-square tests of homogeneity (both the frequentist and Bayesian version, using the same specifications and software as before). All results for frequentist and Bayesian tests are shown in Table 14 (the Pearson residuals for each frequentist test can be found in Figures 1-4). As there are many comparisons, we focus our interpretation on those most pertinent to our research questions and earlier hypotheses on the most frequently used modalities to express each emotion. As a cautionary note, it commonly acknowledged that chi-square tests are sensitive to sample size and tend to yield significant differences more easily when the overall sample is quite large, as is the case here.

***Feeling Moved***

There was a significant difference between the countries in reporting the use of face for expressing feeling moved. The residuals indicate that this finding was primarily driven by the less frequent reporting of the face in China, compared to the other countries. The results from the Bayesian analysis also indicate decisive evidence in favour of the alternative hypothesis (difference between countries).

***Gratitude***

Significant differences emerged between the countries in selecting the voice and words as modalities of gratitude expression. Compared to other countries, the voice was reported more frequently in Australia, Canada, and England, and noticeably less frequently in China and India. Words were less frequently reported in China than in other countries. In line with the frequentist findings, the Bayesian analyses showed decisive evidence in favour of the alternative hypothesis for both the voice and words.

***Interest***

We found significant differences between the countries in the reported use of voice, face, and words to express interest. The voice was reported less frequently in China and India, and more frequently in Canada and England, compared to other countries. Participants reported the face and words less frequently in China than in other countries. The Bayesian analyses demonstrated decisive evidence for the voice and words, and very strong evidence for the face, in favour of the alternative hypothesis.

***Triumph***

The frequentist chi-square tests showed significant differences between the countries when it comes to expressing triumph via the voice, face, and body. The voice and face were reported less frequently in China than in other countries. In the Bayesian analyses, there was decisive evidence for the voice and face, and moderate evidence for the body, in favour of the alternative hypothesis.

**Table 14**

*Cross-Cultural Comparisons Using Frequentist and Bayesian Chi-Square Approach*

| **Emotion** | **Modality** | ***x2*** | ***df*** | ***p*** | ***pBonferroni*** | ***V*** | ***BF10*** |
| --- | --- | --- | --- | --- | --- | --- | --- |
| Feeling Moved | Voice | 97.66 | 9 | <.001 | <.001 | .231 | 5.545 × 1012 |
| **Face** | 154.20 | 9 | <.001 | <.001 | .291 | 1.889 × 1017 |
| Body | 32.45 | 9 | <.001 | .003 | .133 | 0.018 |
| Words | 57.38 | 9 | <.001 | <.001 | .177 | 6319.123 |
| Touch | 25.05 | 9 | .003 | .058 | .117 | 4.046 × 10-4 |
| Gratitude | **Voice** | 197.63 | 9 | <.001 | <.001 | .329 | 1.156 × 1035 |
| Face | 94.75 | 9 | <.001 | <.001 | .228 | 1.049 × 1012 |
| Body | 32.45 | 9 | <.001 | .003 | .133 | 0.020 |
| **Words** | 114.60 | 9 | <.001 | <.001 | .251 | 2.704 × 1010 |
| Touch | 82.29 | 9 | <.001 | <.001 | .212 | 1.819 × 109 |
| Interest | **Voice** | 108.87 | 9 | <.001 | <.001 | .244 | 1.749 × 1015 |
| **Face** | 50.35 | 9 | <.001 | <.001 | .166 | 39.339 |
| Body | 14.41 | 9 | .109 | 1.00 | .089 | 1.620 × 10-6 |
| **Words** | 61.59 | 9 | <.001 | <.001 | .184 | 2646.088 |
| Touch | 87.03 | 9 | <.001 | <.001 | .218 | 2.140 × 106 |
| Triumph | **Voice** | 93.08 | 9 | <.001 | <.001 | .226 | 5.713 × 108 |
| **Face** | 101.91 | 9 | <.001 | <.001 | .236 | 4.643 × 1012 |
| **Body** | 49.71 | 9 | <.001 | <.001 | .165 | 4.895 |
| Words | 69.12 | 9 | <.001 | <.001 | .195 | 1.176 × 106 |
| Touch | 25.59 | 9 | .002 | .048 | .118 | 1.579 × 10-4 |

*Note.* Cramer’s V was calculated as a measure of effect size for the frequentist chi-square tests. The modalities previously hypothesized as most frequently used to express a specific emotion are indicated in bold.

**Figure 1**

*Pearson’s Residuals in Frequentist Cross-Cultural Comparisons for Modalities Used to Express Feeling Moved*


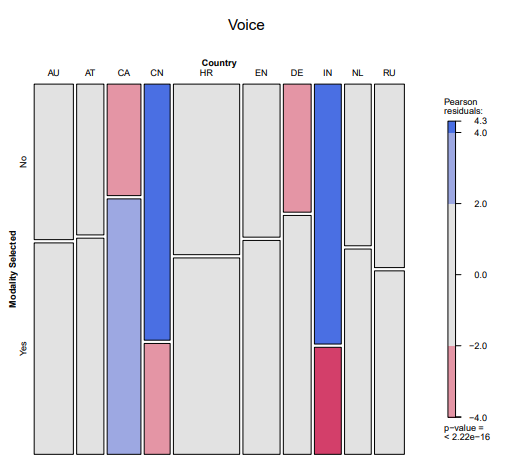


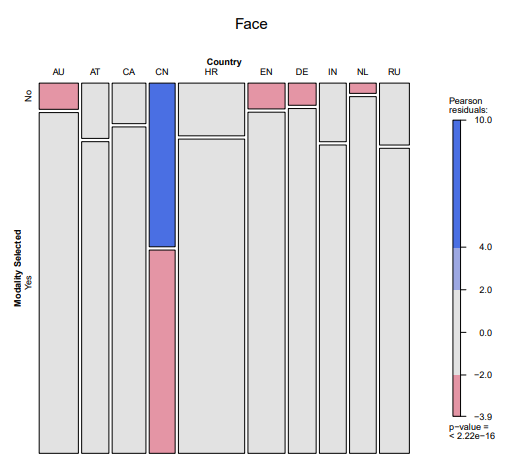


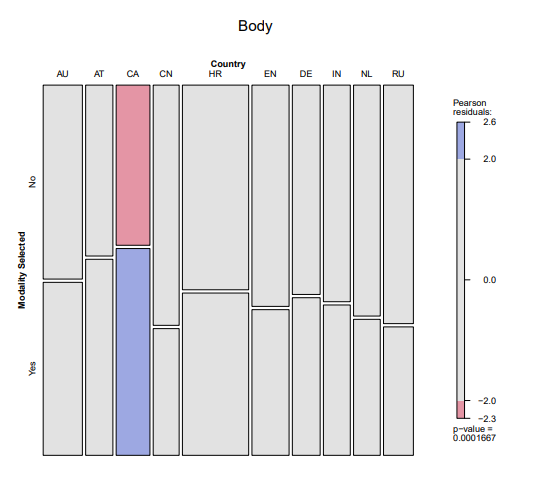


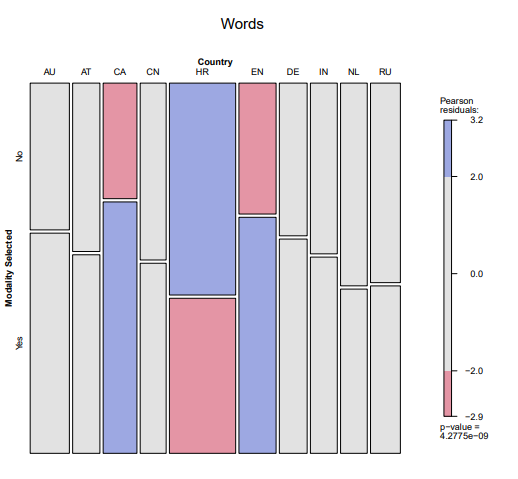


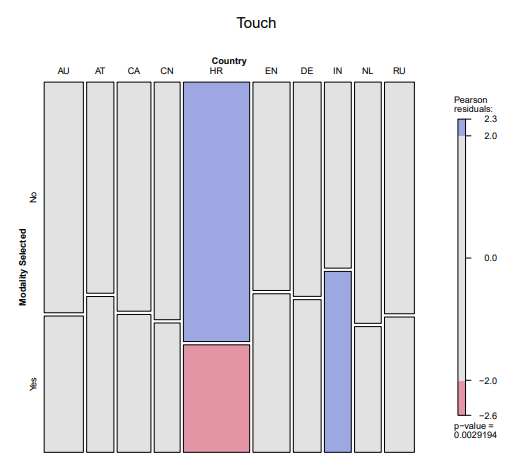


*Note.* The country abbreviations are as follows: AU (Australia), AT (Austria), CA (Canada), CN (China), HR (Croatia), EN (England), DE (Germany), IN (India), NL (the Netherlands), RU (Russia).

**Figure 2**

*Pearson’s Residuals in Frequentist Cross-Cultural Comparisons for Modalities Used to Express Gratitude*

**
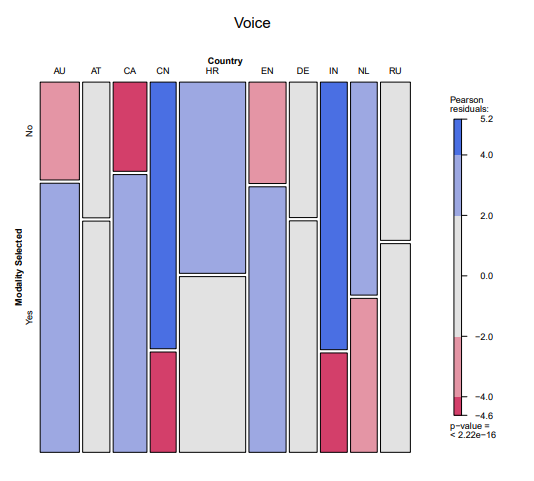
**

**
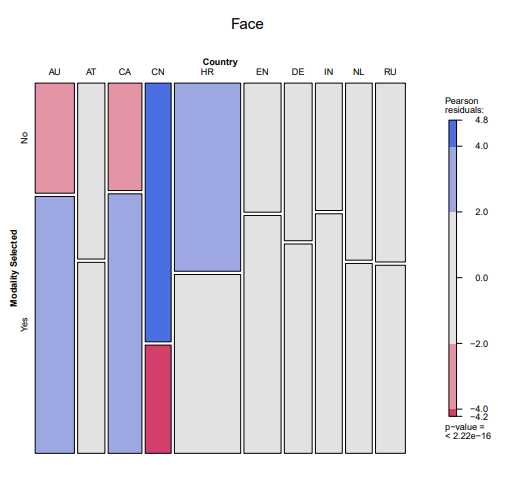
**

**
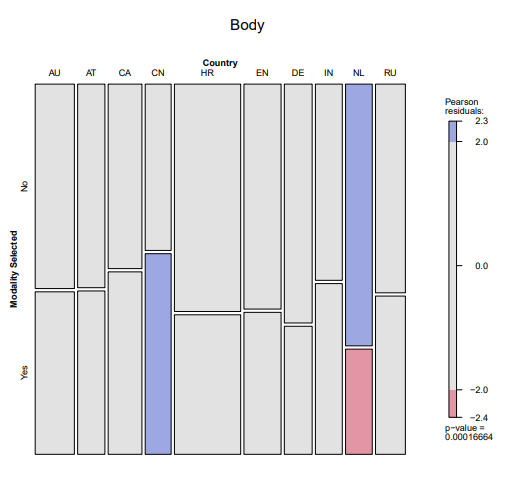
**

**
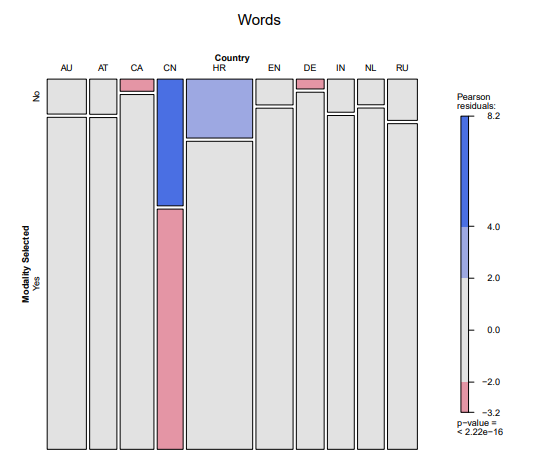
**

**
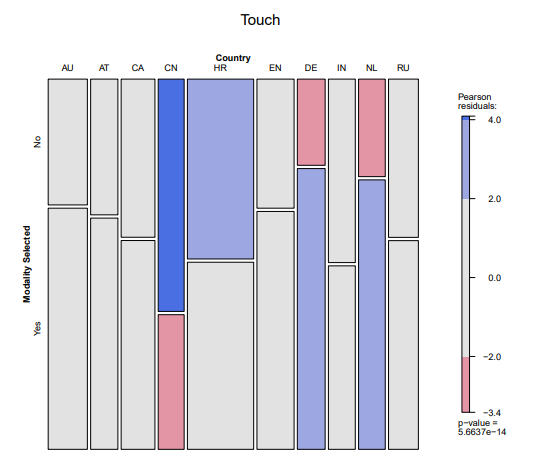
**

*Note.* The country abbreviations are as follows: AU (Australia), AT (Austria), CA (Canada), CN (China), HR (Croatia), EN (England), DE (Germany), IN (India), NL (the Netherlands), RU (Russia).

**Figure 3**

*Pearson’s Residuals in Frequentist Cross-Cultural Comparisons for Modalities Used to Express Interest*


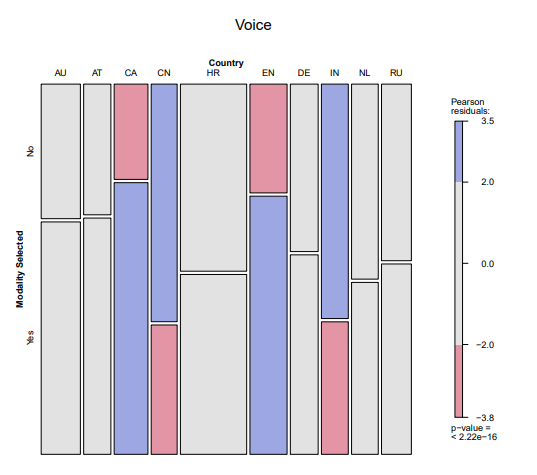


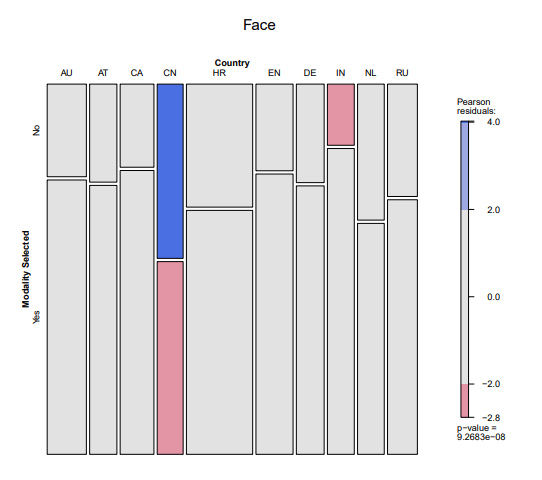


*
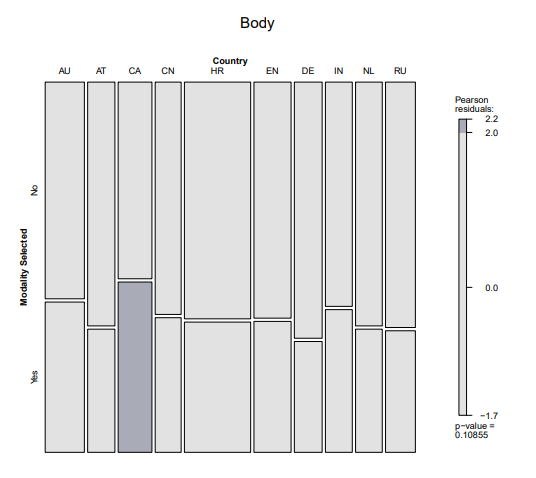
*


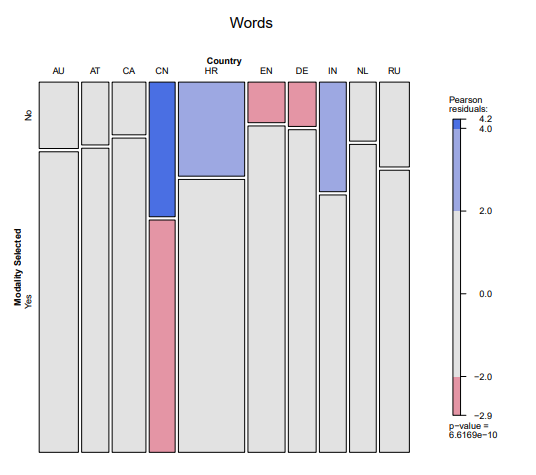


*
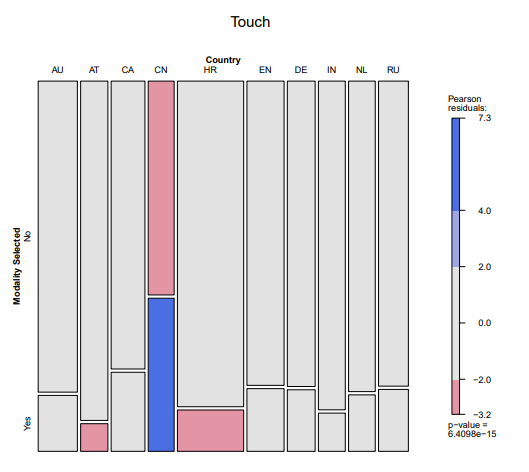
*

*Note.* The country abbreviations are as follows: AU (Australia), AT (Austria), CA (Canada), CN (China), HR (Croatia), EN (England), DE (Germany), IN (India), NL (the Netherlands), RU (Russia).

**Figure 4**

*Pearson’s Residuals in Frequentist Cross-Cultural Comparisons for Modalities Used to Express Triumph*


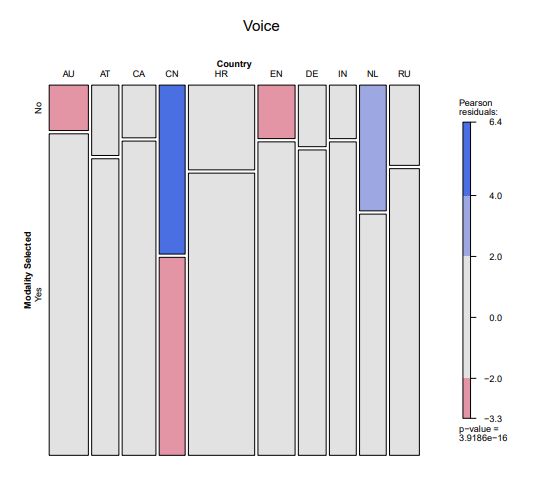


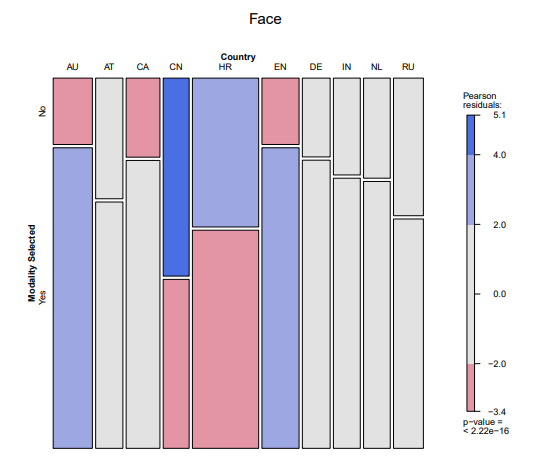


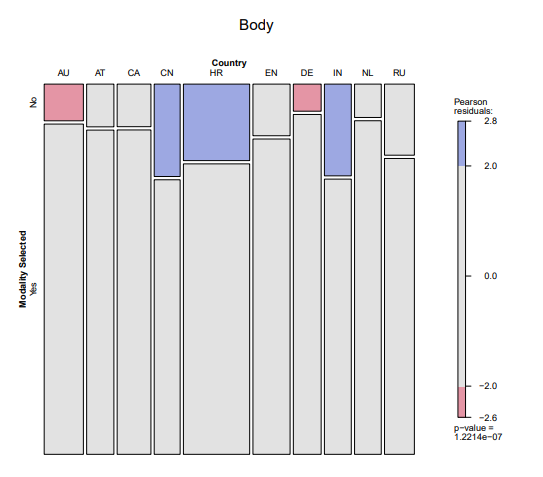


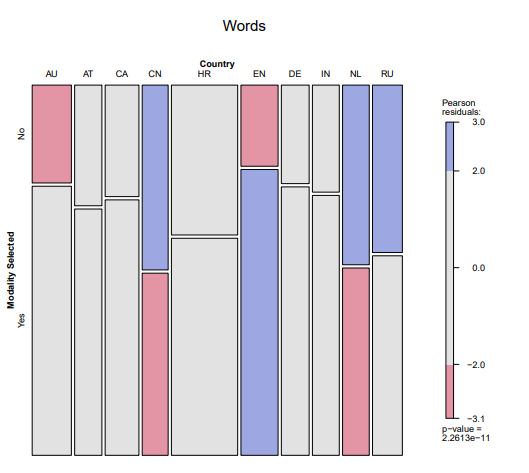


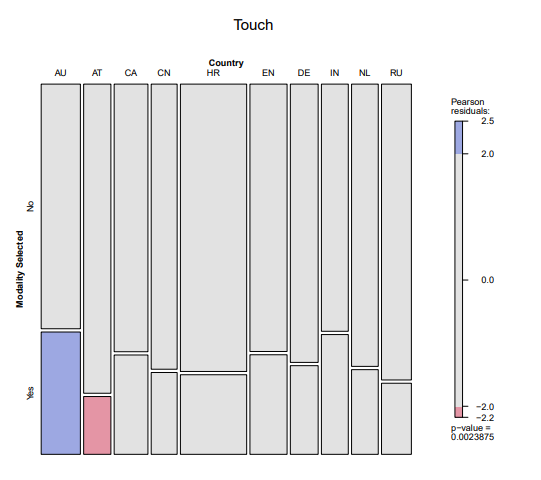


*Note.* The country abbreviations are as follows: AU (Australia), AT (Austria), CA (Canada), CN (China), HR (Croatia), EN (England), DE (Germany), IN (India), NL (the Netherlands), RU (Russia).

**References**

Fagerland, M.W., Lydersen, S., & Laake, P. (2013). The McNemar test for binary matched-pairs data: Mid-p and asymptotic are better than exact conditional. *BMC Medical Research Methodology, 13*(1), 1-8.

Jamil, T., Ly, A., Morey, R. D., Love, J., Marsman, M., & Wagenmakers, E. J. (2017). Default “Gunel and Dickey” Bayes factors for contingency tables. *Behavior Research Methods*, *49*(2), 638-652. <https://doi.org/10.3758/s13428-016-0739-8>

JASP Team (2020). JASP (Version 0.14.1)[Computer software]. <https://jasp-stats.org/>
